# Supplementary material for: Insightful directed evolution of Escherichia coli quorum sensing promoter region of the lsrACDBFG operon: a tool for synthetic biology systems and protein expression
Source: PubMed Central journal article supplement — Nucleic Acids Res. 2016 Oct 24;44(21):10515–25. doi: 10.1093/nar/gkw981 (PMC5137460; doi:10.1093/nar/gkw981), 2016-10-24
Supplement: supp_gkw981_nar-02312-h-2016-File009.pdf [file supp_gkw981_nar-02312-h-2016-File009.pdf]

### Supplementary Figure S1.

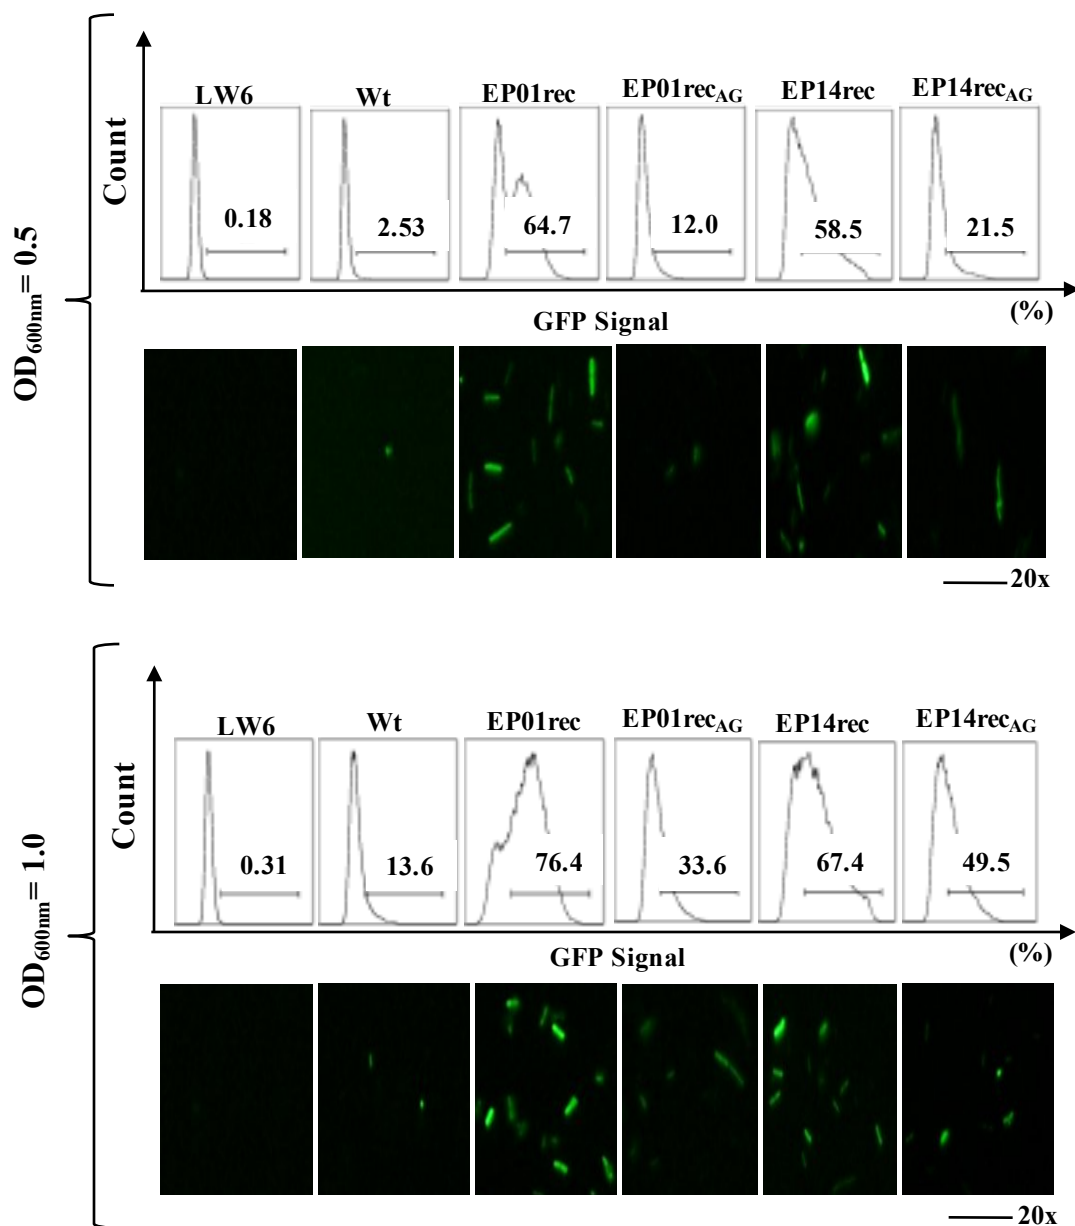

FACS histogram and microscopy fluorescence of GFP expression at OD<sub>600nm</sub>: 0.5 and 1.0.

Supplementary Table S1 - Strains and plasmids used in this study.

| <b><i>E. coli</i> strains</b> | <b>Relevant genotype and property</b>                                                           | <b>Reference or source</b> |
|-------------------------------|-------------------------------------------------------------------------------------------------|----------------------------|
| NEB turbo electrocompetent    | DNA library constructions                                                                       | New England labs           |
| DH5 $\alpha$                  | Used for cloning                                                                                | New England labs           |
| LW6                           | W3110 $\Delta$ <i>lsrR</i> ::Kan                                                                | Wang <i>et al.</i> , 2005  |
| LW7                           | W3110 $\Delta$ <i>lacU169 tna-2</i> $\Delta$ <i>luxS</i> ::Kan                                  | Wang <i>et al.</i> , 2005  |
| <b>Plasmids</b>               |                                                                                                 |                            |
| pTS40                         | pTS1 plasmid backbone, containing <i>tet</i> (A) and <i>gfp</i> reporter genes, Cm <sup>r</sup> | Sohka <i>et al.</i> , 2009 |
| pLSR                          | pTS40 plasmid backbone, containing <i>lsrACDBFG</i> promoter region, Cm <sup>r</sup>            | This study                 |
| pFZY1                         | <i>galK'</i> - <i>lacZYA</i> transcriptional fusion vector, Ap <sup>r</sup>                     | Koop <i>et al.</i> , 1987  |
| pLW11                         | pFZY1 derivative, containing <i>lsrACDBFG</i> promoter region, Ap <sup>r</sup>                  | Wang <i>et al.</i> , 2005  |
| pPH01                         | pFZY1 derivative, containing EP01rec promoter region, Ap <sup>r</sup>                           | This study                 |
| pPH14                         | pFZY1 derivative, containing EP14rec promoter region, Ap <sup>r</sup>                           | This study                 |

Supplementary Table S2 – Primers used in this study.

| Primers        | Sequence                                           | Relevant description                                                                    |
|----------------|----------------------------------------------------|-----------------------------------------------------------------------------------------|
| pts40delampR_F | 5'- CGATACGTA ACTACTAGTTCTGA<br>CGGGCCCGGACACCC-3  | Primer for deletion <i>ampC</i> and <i>ampR</i><br>from pTS40                           |
| pts40delampR_R | 5'- GCTAGGATTAGCCGATCGAAAA<br>GGCCCGCCAATAGCGGGC-3 | Primer for deletion <i>ampC</i> and <i>ampR</i><br>from pTS40                           |
| lsrpF_PvuI     | 5'- CGATCG GCGACCTGTTCTTCT<br>TCACACATT -3         | Primer for cloning <i>lsr</i> operon promoter into pTS40<br>backbone and to create pLSR |
| lsrpR_SpeI     | 5'- ACTAGTTCGATGCCTTTCAGGA<br>CATTG-3              | Primer for cloning <i>lsr</i> operon promoter into pTS40<br>backbone and to create pLSR |
| LsrpEP_F       | 5'- GGCGGGCCTTTTCGATCG -3'                         | Primer for Error-prone PCR                                                              |
| LsrpEP_R       | 5'- CCGGGCCCGTCAGAACTAGT -3'                       | Primer for Error-prone PCR                                                              |
| gfpmut2_F      | 5'-ACTACTTTCGCGTATGGTCTT C-3'                      | qPCR                                                                                    |
| gfpmut2_R      | 5'- TTCAGCACGTGTCTTGTAGTT-3'                       | pPCR                                                                                    |
| lsrpF_BamHI    | 5'- ATCCGCGGATCCGCGAC<br>CTGTTCTTCTTCACACATT-3     | Primer for cloning <i>lsr</i> operon<br>promoter into pFZY1                             |
| lsrpR_HindIII  | 5' CTACCCAAGCTTTCGATGC<br>CTTTCAGGACATTG-3         | Primer for cloning <i>lsr</i> operon<br>promoter into pFZY1                             |

Supplementary Table S3 – Mutagenic primers used in this study.

| Primers     | Sequence                                             | Relevant description                                                                 |
|-------------|------------------------------------------------------|--------------------------------------------------------------------------------------|
| plsrR_F     | 5'-CACTTTGAACATATTTAAATCTTTAATGCAATTG<br>TTCAGTT-3'  | Mutagenic primer to restore p- <i>lsr</i> R-box sites                                |
| plsrR_R     | 5'- AACTGAACAATTGCATTAAAGATTTAAATATGT<br>TCAAAGTG-3' | Mutagenic primer to restore p- <i>lsr</i> R-box sites                                |
| plsrR4_F    | 5'- CACATTGAACATATTTAAATCTTTAATGCAATTG<br>TTCAGTT-3' | Mutagenic primer to restore p- <i>lsr</i> R-box sites<br>in EP04 sequence            |
| plsrR4_R    | 5'- AACTGAACAATTGCATTAAAGATTTAAATATGT<br>TCAATGTG-3' | Mutagenic primer to restore p- <i>lsr</i> R-box sites in<br>EP04 sequence            |
| plsrR6/12_F | 5'- CACTTTAAACATATTTAAATCTTTAATGCAATTGT<br>TCAGTT-3' | Mutagenic primer to restore p- <i>lsr</i> R-box sites<br>in EP06 and EP12 sequence   |
| plsrR6/12_R | 5'- AACTGAACAATTGCATTAAAGATTTAAATATGT<br>TTAAAGTG-3' | Mutagenic primer to restore p- <i>lsr</i> R-box sites<br>in EP06 and EP12 sequence   |
| mutAG1_F    | 5'- ATTCGTCAGAAATATGTGCAATGTCCACCTAAGG-3'            | Mutagenic primer to restore G into putative<br>CytR-binding site in EP01rec sequence |
| mutAG1_R    | 5'- CCTTAGGTGGACATTGCACATATTTCTGACGAAT-3'            | Mutagenic primer to restore G into putative<br>CytR-binding site in EP01rec sequence |
| mutAG14_F   | 5- ATTCGTCGGAAATATGTGCAATGTCCACCTAAGG-3'             | Mutagenic primer to restore G into putative<br>CytR-binding site in EP14rec sequence |
| mutAG14_R   | 5'- CCTTAGGTGGACATTGCACATATTTCCGACGAAT-3'            | Mutagenic primer to restore G into putative<br>CytR-binding site in EP14rec sequence |

Supplementary Table S4 - Putative CytR-binding sites found in *E. coli lsrACDBFG* operon promoter.

| <b><i>lsrACDBFG</i> operon direction</b>    |          |       |                                                |       |
|---------------------------------------------|----------|-------|------------------------------------------------|-------|
| <b>Left motif (highest to lowest score)</b> |          |       | <b>Highest motif (highest to lowest score)</b> |       |
| Rank                                        | Sequence | Score | Sequence                                       | Score |
| 1                                           | AATGCAAT | 0.847 | TGTGCAAT                                       | 0.741 |
| 2                                           | AACGCAAC | 0.845 | TTTAAATC                                       | 0.737 |
| 3                                           | CGTGAAAA | 0.794 | AATACATT                                       | 0.733 |
| 4                                           | CCTGCAAA | 0.788 | AATGCAAT                                       | 0.723 |
| 5                                           | TATTTAAA | 0.766 | ATAGCATA                                       | 0.715 |
| 6                                           | TGTGCAAT | 0.765 | TTTGAACA                                       | 0.703 |
| 7                                           | ATGGCAAC | 0.754 | GTTCAAAA                                       | 0.702 |

  

| <b><i>lsrRK</i> operon direction</b> |          |       |          |       |
|--------------------------------------|----------|-------|----------|-------|
| Rank                                 | Sequence | Score | Sequence | Score |
| 1                                    | AATGTATT | 0.797 | ATTGCATT | 0.918 |
| 2                                    | GATATAAA | 0.770 | GTTGCGTT | 0.852 |
| 2 (tie)                              | GATTTAAA | 0.770 | GTTGCCAT | 0.804 |
| 4                                    | AGTCAAAC | 0.758 | TTTGCAGG | 0.788 |
| 5                                    | TGAGCAAG | 0.748 | ATTGCACA | 0.787 |
| 6                                    | AATGAATT | 0.741 | TTTTAATT | 0.757 |
| 7                                    | AAAGTGAA | 0.724 | TTTAAATA | 0.743 |
